# Supplementary material for: Preconception Care Education for Women With Diabetes: A Systematic Review of Conventional and Digital Health Interventions
Source: PubMed Central journal article supplement (PMC5120238; doi:10.2196/jmir.5615), 2016-11-08
Supplement: jmir_v18i11e291_app1.pdf [file jmir_v18i11e291_app1.pdf]

## APPENDIX 1: Detailed Electronic Database Search Strategies

### Medline Strategy

| Terms                                                                                                                                                                                                                                                                                                                                                                                                                                                                                                                                                                                                                                                                                                            | Returns |
|------------------------------------------------------------------------------------------------------------------------------------------------------------------------------------------------------------------------------------------------------------------------------------------------------------------------------------------------------------------------------------------------------------------------------------------------------------------------------------------------------------------------------------------------------------------------------------------------------------------------------------------------------------------------------------------------------------------|---------|
| (pre#concept* care OR pre#concept* OR pre#concept* counse*ing OR pre#concept* education OR pre#pregnan* care OR pre#pregnan* plan* OR pre#pregnan* OR pre#concep* adj1 care) AND (diabetes OR diabetes mellitus OR diabet* OR type 1 diabetes OR type 2 diabetes OR insulin dependent diabet* OR non#insulin dependent diabet* OR IDDM OR NIDDM) AND (anomal* OR congenital anomal* OR malformation* OR malformations* OR birth defect* OR health outcome* OR pregnancy outcome* OR obstetric outcome* OR adverse adj1 outcome* OR knowledge OR attitude OR behaviour change) AND (maternal OR maternal health OR mother* OR gestation OR pregnan* OR wom*n OR infant OR f*tus OR neonat* OR newborn* OR child). | 375     |
