# Supplementary material for: Preconception Care Education for Women With Diabetes: A Systematic Review of Conventional and Digital Health Interventions
Source: J Med Internet Res. 2016 Nov 8;18(11):e291. doi: 10.2196/jmir.5615 (PMC5120238; doi:10.2196/jmir.5615)
Supplement: Multimedia Appendix 2 [file jmir_v18i11e291_app2.pdf]

Table 1. Summary characteristics and quality assessment of reviewed articles

| Author or country                            | Study population                                                                                                                                                                                                                                      | Methods or focus                                                                                                              | Intervention                                                                                                                                                                                                                                                                                                                                                                                                                                                                                | Findings                                                                                                                                                                                                                   | Quality assessment |
|----------------------------------------------|-------------------------------------------------------------------------------------------------------------------------------------------------------------------------------------------------------------------------------------------------------|-------------------------------------------------------------------------------------------------------------------------------|---------------------------------------------------------------------------------------------------------------------------------------------------------------------------------------------------------------------------------------------------------------------------------------------------------------------------------------------------------------------------------------------------------------------------------------------------------------------------------------------|----------------------------------------------------------------------------------------------------------------------------------------------------------------------------------------------------------------------------|--------------------|
| Boulot et al [56] or France                  | 435 pregnant women with DM <sup>a</sup> .<br><br>T1DM <sup>b</sup> , n=289 (intervention =140/289, 48.5% received the intervention, control=149).<br><br>T2DM <sup>c</sup> , n=146 (intervention=35/146, 24% received the intervention, control=111). | Prospective cohort study.<br><br>To determine if PCC <sup>d</sup> interventions improved pregnancy outcomes in women with DM. | Oral PCC educational intervention delivered by health care professionals (HCPs <sup>e</sup> ; diabetologists).<br><br>Advice regarding blood glucose optimization, diabetes complications, dietary modification, self-monitoring of blood glucose levels, and insulin therapy.<br><br>Information was collected on HbA1c <sup>f</sup> >8% in the first trimester.<br><br>The duration of intervention was not specified.<br><br>Face-to-face time with the women was not indicated.         | Significantly lower no of women with HbA1c >8% in intervention group compared with control (4.3% vs 55%; $P<.001$ and 2.9% vs 27.9%; $P<.001$ ) for T1DM and T2DM, respectively).                                          | (9/18)             |
| Galindo et al [57] or Spain                  | 127 Women with T1DM and T2DM.<br><br>Intervention, n=15/127, 12% received the intervention, control, n=112.                                                                                                                                           | Prospective cohort study.<br><br>To investigate the effect of DM on pregnancy outcome.                                        | Oral PCC educational intervention delivered by health care professionals (HCPs).<br><br>Advice regarding self-monitoring of blood glucose levels and intensification of insulin therapy.<br><br>Duration of intervention was not specified.<br><br>Face-to-face time with the women was not indicated.                                                                                                                                                                                      | 3/15 of pregnancies in intervention group and 14/112 in control group resulted in congenital malformations.<br><br>1 spontaneous abortion was recorded in the intervention group compared with 9 in the control.           | (9/18)             |
| Temple et al 2006 [53, 54] or United Kingdom | 290 pregnancies to women with T1DM.<br><br>Intervention, n=110/290, 37.9% received the intervention, control, n=180.                                                                                                                                  | Prospective cohort study.<br><br>To investigate the relationship between PCC and obstetric outcomes in women with T1DM.       | Oral PCC educational intervention provided by HCPs (doctors, dieticians and DSNs <sup>g</sup> ).<br><br>Advice regarding blood glucose monitoring, glycemic control, and initiation of folic acid supplements after stopping contraception, smoking cessation, and avoidance of teratogens such as ACE <sup>g</sup> inhibitors and statins.<br><br>Targets were set for pre and postprandial blood glucose levels. The intervention group attended a PCC center at intervals of 1-3 months. | There was lower spontaneous abortion (5.7% vs 14.0%; $P=.06$ ), adverse pregnancy outcome (2.9 vs 10.2; $P=.03$ ), and premature delivery (5.0% vs 14.2%; $P=.02$ ) rates in the intervention group compared with control. | (13/18)            |
| Author or                                    | Study                                                                                                                                                                                                                                                 | Methods or                                                                                                                    | Intervention                                                                                                                                                                                                                                                                                                                                                                                                                                                                                | Findings                                                                                                                                                                                                                   | Quality            |

| country                                | population                                                                                                     | focus                                                                                                                                         |                                                                                                                                                                                                                                                                                                                         |                                                                                                                                                                                                                                                                                                                                                                       | assessment |
|----------------------------------------|----------------------------------------------------------------------------------------------------------------|-----------------------------------------------------------------------------------------------------------------------------------------------|-------------------------------------------------------------------------------------------------------------------------------------------------------------------------------------------------------------------------------------------------------------------------------------------------------------------------|-----------------------------------------------------------------------------------------------------------------------------------------------------------------------------------------------------------------------------------------------------------------------------------------------------------------------------------------------------------------------|------------|
| Tripathi et al [44] or United Kingdom  | 588 women with T1DM and T2DM.<br><br>Intervention, n=240/588, 40.8% received the intervention, control, n=297. | Prospective cohort study.<br><br>To investigate the association between PCC and obstetric outcomes, as well as pregnancy planning indicators. | Oral PCC educational intervention provided by HCPs.<br><br>Counseling regarding PCC.<br><br>The content of the intervention was not described.<br><br>Duration of the intervention was not specified.<br><br>Face-to-face time with women was not indicated.                                                            | PCC intervention led to significant improvements in HbA1c before (OR <sup>i</sup> 1.91, 95% CI 1.10 to 3.04; $P=.002$ ) and during pregnancy (OR 2.05, 95% CI 1.39 to 3.03); $P<.001$ ), and in folic acid intake (OR 4.88, 95% CI 3.26 to 7.30; $P<.001$ ) in intervention group compared with control.                                                              | (11/18)    |
| Murphy et al [43] or United Kingdom    | 680 women with T1DM and T2DM.<br><br>Intervention, n=181/680, 26.6% received the intervention, control, n=499. | Prospective cohort study.<br><br>To investigate the association between PCC and obstetric outcomes.                                           | Oral PCC educational intervention delivered by HCPs (doctors, nurses, and midwives).<br><br>Structured education regarding PCC.<br><br>The content of the intervention was not described in the paper.<br><br>Frequency of face-to-face time with the women ranged from 1 to 7.                                         | Intervention group presented significantly earlier for PNC <sup>h</sup> (6.7 vs 7.7 weeks; $P<.001$ ), and was unlikely to be taking ACE inhibitors (1.1 vs 4.6%; $P=.05$ ) and statins (0 vs 7.6%; $P<.001$ ) at conception compared with control. HbA1c improved in the intervention group and was sustained through the first trimester (6.9% vs 7.6%; $P<.001$ ). | (14/18)    |
| Neff et al [55] or Republic of Ireland | 505 women with T1DM.<br><br>Intervention, n=70/505, 14% received the intervention, control, n=394.             | Retrospective cohort study.<br><br>To analyze effect of PCC on obstetric outcomes.                                                            | Oral educational intervention provided by HCPs (DSNs, endocrinologists, dieticians).<br><br>Advice regarding insulin therapy, discontinuation and replacement of teratogens such as ACE inhibitors and statins, intake of 5mg folic acid and retinal assessment.<br><br>Face-to-face time with women was not indicated. | PCC education led to better HbA1c (6.9 vs 7.8%); $P<.001$ and earlier presentation for PNC [(6 ± 2 vs 8 ± 6 weeks; $P<.001$ ) in the intervention group compared with control.                                                                                                                                                                                        | (13/18)    |
| Kekalainen et al [58] or Finland       | 145 pregnancies to women with T1DM.<br><br>Intervention, n=96/145, 66% control, n=49.                          | Retrospective cohort study.<br><br>To evaluate the effect of pregnancy planning on glycemic control and pregnancy outcomes.                   | Oral educational intervention provided by HCPs (doctors).<br><br>Advice regarding glycemic control, screening for diabetes complications and hypertension, medication review, and folic acid supplementation.<br><br>Face-to-face time with women not indicated.                                                        | Intervention group had significantly lower HbA1c before conception (7.06% vs 9.11%; $P<.001$ ) which was sustained throughout pregnancy (6.37% vs 7.28%; $P<.001$ ). Congenital malformation rate was lower (2.5% vs 11.1%; $P<.001$ ) in the intervention compared with control.                                                                                     | (12/18)    |
| Author or country                      | Study                                                                                                          | Methods or                                                                                                                                    | Intervention                                                                                                                                                                                                                                                                                                            | Findings                                                                                                                                                                                                                                                                                                                                                              | Quality    |

|                                                | population                                                                                                    | focus                                                                                                                            |                                                                                                                                                                                                                                                                                                                                                                                                                                                                                                          |                                                                                                                                                                                                                                                                                                | assessment         |
|------------------------------------------------|---------------------------------------------------------------------------------------------------------------|----------------------------------------------------------------------------------------------------------------------------------|----------------------------------------------------------------------------------------------------------------------------------------------------------------------------------------------------------------------------------------------------------------------------------------------------------------------------------------------------------------------------------------------------------------------------------------------------------------------------------------------------------|------------------------------------------------------------------------------------------------------------------------------------------------------------------------------------------------------------------------------------------------------------------------------------------------|--------------------|
| Charron-prochownik et al [10] or United States | 53 adolescent girls with T1DM (16-19.9 years).<br><br>Intervention, n=37 (CD-ROM-17, book-20), control, n=16. | Randomized controlled trial.<br><br>To develop and assess the clinical feasibility of a PCC program for young women with DM.     | PCC educational intervention provided via eHealth application. READY-Girls program was developed by authors.<br><br>The CD-ROM contained information on DM and its effects on reproductive health, sexuality, puberty and pregnancy; advantages of PCC; sessions on decision making and communication skills development.<br><br>Intervention participants viewed a CD-ROM and received one comprehensive session on the content of the CD-ROM at their routine clinic visit. This lasted about an hour. | Knowledge ( $F_{2,40.1}=3.77$ ; $P=.03$ ) and perceived benefits ( $F_{2,40.1}=3.48$ ; $P=.04$ ) of PCC significantly improved by the end of the study.<br><br>Significant increase in intention to seek PCC and utilize effective family planning ( $F_{1,37}=5.75$ ; $P=.02$ ) was recorded. | (12/18)            |
| Fischl et al [11] or United States             | 88 adolescent girls with T1DM (13-19.9 years).<br><br>Intervention, n=43, control, n=45.                      | Randomized controlled trial. To assess the effectiveness of PCC on behavioral and cognitive outcomes.                            | PCC educational intervention provided via eHealth application.<br><br>READY-Girls preconception care program was used to promote the benefit of PCC.<br><br>Intervention participants viewed an educational CD-ROM, read a book, and received a nurse consultation over 3 consecutive clinic visits at intervals of 3 months.                                                                                                                                                                            | Knowledge ( $F=32.34$ ; $P<.001$ ) and perceived benefit of PCC ( $F=9.70$ ; $P=.003$ ) increased by the end of the study.<br><br>Significant improvement over time in actual initiation of PCC discussion with diabetes health care team ( $F=14.6$ ; $P<.001$ ).                             | (16/18)            |
| Holmes et al [12] or United Kingdom            | 97 women with DM (16-40 years).<br><br>T1DM, n=89, T2DM, n=8.                                                 | Before and after study.<br><br>To determine if an educational DVD increases knowledge and changes attitudes of women toward PCC. | PCC educational intervention provided via eHealth application.<br><br>The authors developed and explored the use of a DVD to raise awareness of pregnancy planning and prevention of unplanned pregnancies.<br><br>Women viewed an educational DVD with information on pregnancy planning, contraception use, pregnancy complications, and PCC advice.<br><br>The number of times they viewed the DVD or the duration of the intervention was not reported.                                              | Significant improvement in self-confidence to use contraception to prevent unplanned pregnancies and access PCC (OR 3.3, CI 1.9, to 4.7; $P<.001$ ).<br><br>Significant reduction in perceived barriers to PCC (OR -0.7, CI -1.2 to -0.2); $P=.01$ ).                                          | (12/18)            |
| Author or country                              | Study population                                                                                              | Methods or focus                                                                                                                 | Intervention                                                                                                                                                                                                                                                                                                                                                                                                                                                                                             | Findings                                                                                                                                                                                                                                                                                       | Quality assessment |

|                                                |                                                                                                  |                                                                                                                               |                                                                                                                                                                                                                                                                                  |                                                                                                                                                                                                                  |       |
|------------------------------------------------|--------------------------------------------------------------------------------------------------|-------------------------------------------------------------------------------------------------------------------------------|----------------------------------------------------------------------------------------------------------------------------------------------------------------------------------------------------------------------------------------------------------------------------------|------------------------------------------------------------------------------------------------------------------------------------------------------------------------------------------------------------------|-------|
| Charron-prochownik et al [13] or United States | 109 adolescent girls with T1DM and T2DM (13-19 years).<br><br>Intervention, n=51, control, n=58. | Randomized controlled trial.<br><br>To examine the long-term effect of the READY-Girls program on PCC knowledge and behavior. | PCC educational intervention provided via eHealth application.<br><br>READY-Girls PCC program was used to enhance PCC knowledge and behaviors.<br><br>Intervention patients viewed 2 educational DVDs and read a book over 3 consecutive clinic visits at intervals of 3 months. | Increased intention ( $F_{6,82.4} = 2.56$ ; $P = .03$ ) to initiate diabetes discussion with HCPs.<br><br>Significant increase in intention to seek PCC and plan a pregnancy ( $F_{6,534} = 2.58$ ; $P = .02$ ). | 16/18 |
|------------------------------------------------|--------------------------------------------------------------------------------------------------|-------------------------------------------------------------------------------------------------------------------------------|----------------------------------------------------------------------------------------------------------------------------------------------------------------------------------------------------------------------------------------------------------------------------------|------------------------------------------------------------------------------------------------------------------------------------------------------------------------------------------------------------------|-------|

<sup>a</sup>DM: diabetes mellitus.

<sup>b</sup>T1DM: type 1 diabetes mellitus.

<sup>c</sup>T2DM: type 2 diabetes mellitus.

<sup>d</sup>PCC: preconception care.

<sup>e</sup>HCPs: Health care professionals.

<sup>f</sup>DSN: Diabetes specialist nurse.

<sup>g</sup>ACE: angiotensin-converting enzyme.

<sup>h</sup>PNC: prenatal care.

<sup>i</sup>HbA1c: glycosylated haemoglobin.

<sup>j</sup>OR: odds ratio.

<sup>k</sup>READY-Girls: Reproductive-health education and awareness of diabetes in youth for girls.
